# Supplementary material
Source: Springer Nature journal article supplement (https://www.springermedizin.de/resource/supplementary/13012_2011_461_MOESM2_ESM.pdf/9630034)
Supplement: MOESM2 [file 9630034]

460 potentially relevant studies identified

34 articles presented conceptualizations or reviews of sustainability

426 studies selected for full text evaluation

301 excluded articles

- Report or description of initial implementation (128)
- Reports on initial outcomes only (73)
- Insufficient information provided (31)
- Narrative/lessons learned (17)
- Insufficient information on implementation (16)
- Long-term follow-up from clinical trial (13)
- Timeframe/timeline unclear (12)
- Original funding present (6)
- Not on implementation or sustainability (4)
- Development of measures (1)

125 studies selected for evaluation
